# Supplementary material for: From Sensor Data to Animal Behaviour: An Oystercatcher Example
Source: PLOS journal article supplement (doi:10.1371/journal.pone.0037997), 2012-05-31
Supplement: S4 (10.1371/journal.pone.0037997.s004) [file journal.pone.0037997.s004]

## Supporting Information

**Table S1.** The total number of GPS fixes and accelerometer segments (3 s intervals) obtained from the date of deployment through 31 July 2009 for each of the three oystercatchers in this study.

Individual ring code, logger number, sex and body mass (g) on date of deployment are also provided.

| Ring code | Logger # | Sex    | Body mass (g) | Date of    | GPS  | Accelerometer |
|-----------|----------|--------|---------------|------------|------|---------------|
|           |          |        |               | deployment |      |               |
| WR101RW3  | 166      | Male   | 483           | 30 June    | 3933 | 2496          |
| GW111W3   | 167      | Male   | 577           | 29 June    | 3652 | 2413          |
| GB021B3   | 169      | Female | 502           | 29 June    | 3835 | 2418          |
